# Supplementary material for: Redox Status of Pregnant Ewes after Vaccination against Clostridial Diseases
Source: MDPI journal article supplement (doi:10.3390/vaccines10060898), 2022-06-05
Supplement: s1 [file s1]

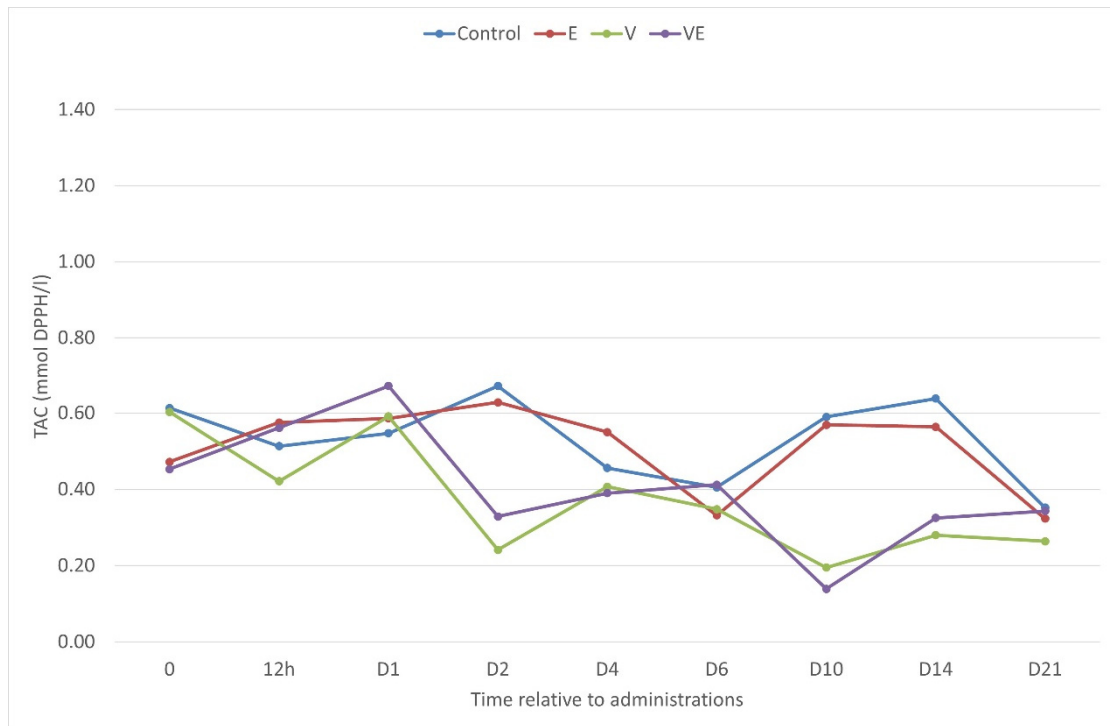

**Figure S1.** Mean TAC values (mmol DPPH/L) detected in all groups of ewes throughout the study period

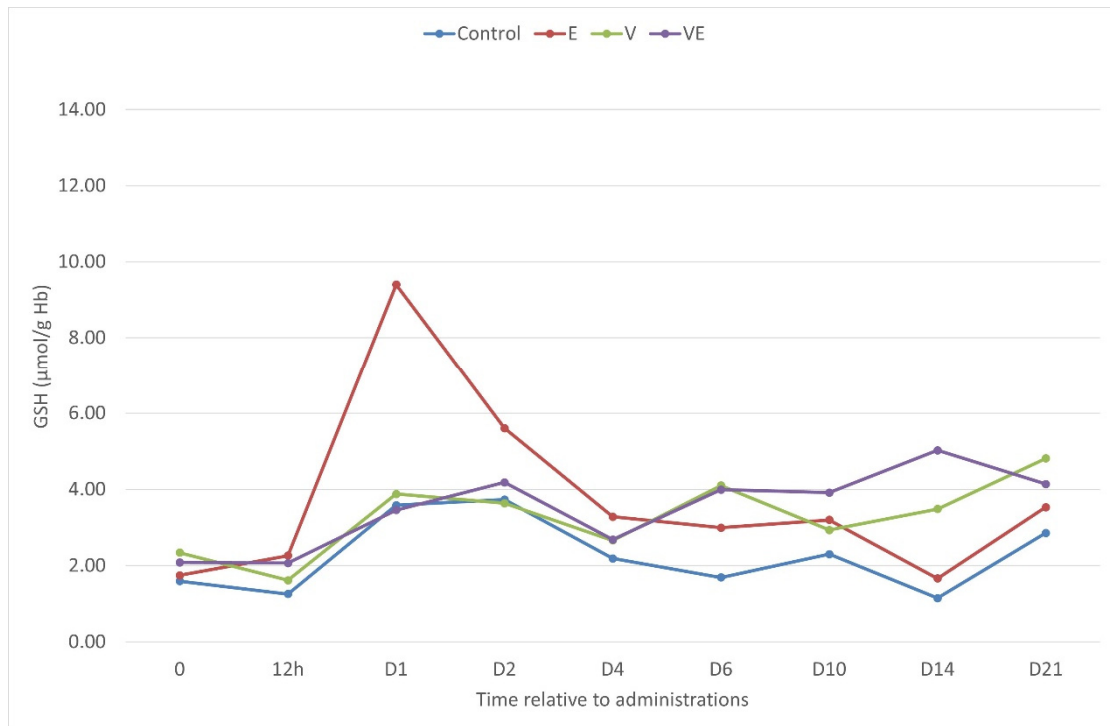

**Figure S2.** Mean GSH values (μmol/gr Hb) detected in all groups of ewes throughout the study period

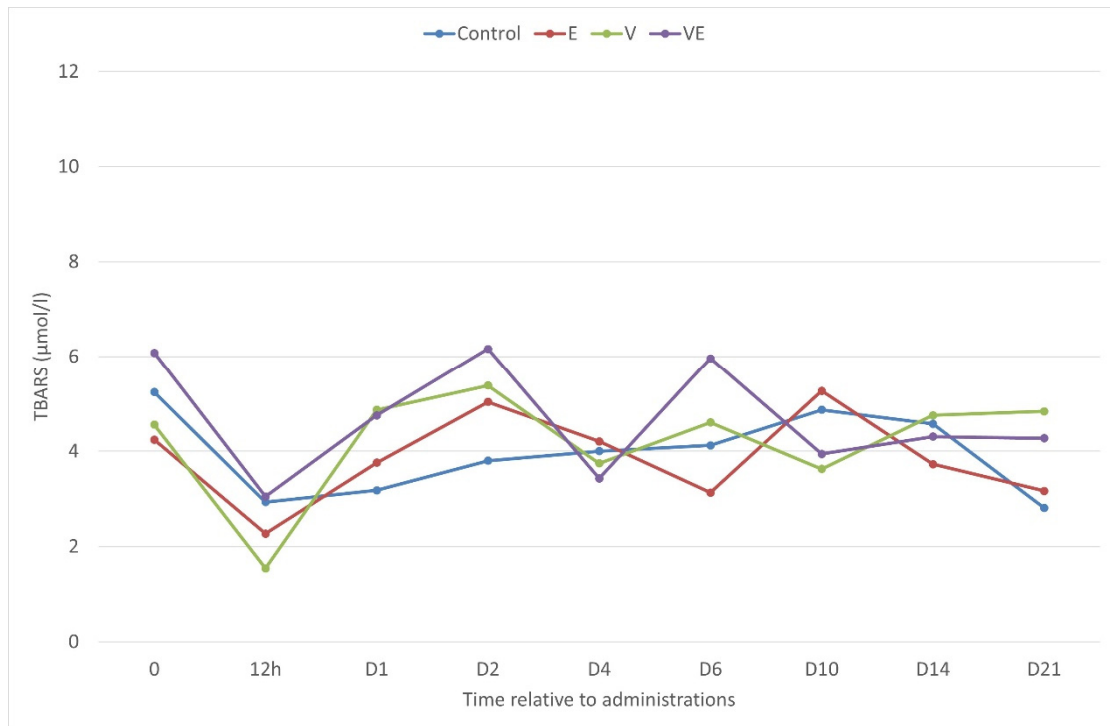

**Figure S3.** Mean TBARS values (μmol/L) detected in all groups of ewes throughout the study period.

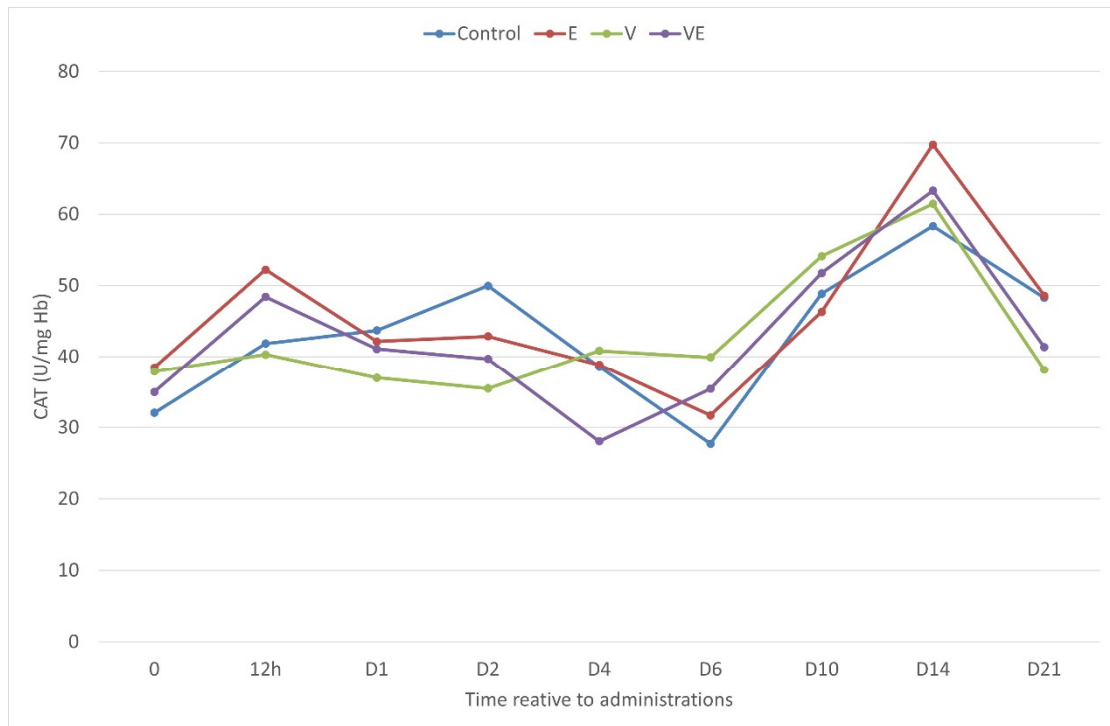

**Figure S4.** Mean CAT values (U/mg Hb) detected in all groups of ewes throughout the study period
